## RESEARCH ARTICLE

# Theory of mind in remitted bipolar disorder: Interpersonal accuracy in recognition of dynamic nonverbal signals

Usue Espinós<sup>1\*</sup>, Enrique G. Fernández-Abascal<sup>1</sup>, Mercedes Ovejero<sup>2</sup>

**1** Facultad de Psicología, Universidad Nacional de Educación a Distancia, Madrid, Spain, **2** Facultad de Psicología, Universidad Complutense de Madrid, Madrid, Spain

\* [usueespinos@asocbipolar.com](mailto:usueespinos@asocbipolar.com)

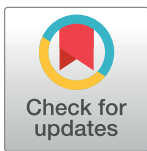

## Abstract

A relatively unexplored aspect in bipolar disorder (BD) is the ability to accurately judge other's nonverbal behavior. To explore this aspect of social cognition in this population is particularly meaningful, as it may have an influence in their social and interpersonal functioning. The aim of this research was to study interpersonal accuracy (IPA) in remitted BDs, that is, the specific skills that fall under the general term *Theory of Mind* (ToM). Study participants included 119 remitted individuals with BD (70 BD I and 49 BD II), and they were compared with a group of 39 persons diagnosed with unipolar depression (UD) and 119 control participants. The MiniPONS was used to test the whole spectrum of nonverbal cues as facial expressions, body language and voice. Results indicated a superiority of the control group with statistically significant differences both in the performance in the MiniPONS (number of right answers) and in each of the areas evaluated by this test. BD groups, in recognition of the meaning of gestures in face, body and voice intonation, performed significantly worse than controls. ANCOVA analysis controlling the effect of age shows that control group performed significantly better compared to clinical groups, and there were no differences between UD and BD groups. The results indicate a deficit in IPA and suggest that better comprehension of deficiencies in interpersonal accuracy in BD may help to develop new training programs to improve in these patients the understanding of others, which might have a positive impact in their psychosocial functionality, and thus lead to the objective of functional rehabilitation.

## OPEN ACCESS

**Citation:** Espinós U, Fernández-Abascal EG, Ovejero M (2019) Theory of mind in remitted bipolar disorder: Interpersonal accuracy in recognition of dynamic nonverbal signals. PLoS ONE 14(9): e0222112. <https://doi.org/10.1371/journal.pone.0222112>

**Editor:** Zezhi Li, National Institutes of Health, UNITED STATES

**Received:** March 22, 2019

**Accepted:** August 21, 2019

**Published:** September 11, 2019

**Copyright:** © 2019 Espinós et al. This is an open access article distributed under the terms of the [Creative Commons Attribution License](https://creativecommons.org/licenses/by/4.0/), which permits unrestricted use, distribution, and reproduction in any medium, provided the original author and source are credited.

**Data Availability Statement:** The authors provide an anonymized dataset that does not contain potentially identifying information. All relevant data are within the manuscript and its Supporting Information files.

**Funding:** The authors received no specific funding for this work.

**Competing interests:** The authors have declared that no competing interests exist.

## Introduction

Bipolar disorder (BD) is a psychiatric disorder characterized by periods of mania and depression [1]. Bipolar I (BD I) and II (BD II) are defined by a history of phases of elevated mood and a history of major depressive episodes, but BD II is distinguished from BD I by the presence of episodes of hypomania [1]. Despite treatment, many individuals with BD experience impaired functioning [2]. BD is associated with high rates of disability, with significant impairment in work, family and social life, beyond the acute phases of the illness [3]. These

impairments in BD (I and II) persist even after significant mood symptoms have remitted. It is estimated that up to 60% of individuals do not recover completely after episodes [4] and only 38% of them achieve functional recovery after a manic phase [5]. This means that work productivity and employment may be negatively influenced [6]. Recovery includes not only symptomatic but also functional or premorbid levels of previous psychosocial functionality, and adaptive social relations. The quality of interpersonal relationships is often mentioned as one of the most important outcomes for patients with BD [7], as social impairment is observed in many patients with this disorder [8, 9]. Almost half of BD I patients and approximately three quarters of those with BD II will first have an episode of depression [10] and they can be misdiagnosed with unipolar depression (UD). This issue may lead to inadequate treatment [11], and this may have clinically relevant consequences. In many cases, it is difficult to distinguish BD from UD, approximately 69% of patients with BD are initially misdiagnosed with UD [12]. BD and UD have similarities and differences; both are chronic and recurrent disorders and both diseases may lead to cognitive and functional impairment [13, 14]. Individuals with UD present depressive episodes only, and those with BD II or I disorder show increasingly pronounced episodes of mood elevation. Another difference refers to the age of onset: patients with BD are younger at onset of first mood episode [15]. Clinical severity is greater among BD patients, as they have a higher prevalence of suicidal ideation [10].

The factors that may play a role in functional recovery of BD have been seldom studied, and understanding facts that might contribute to such inabilities is of essential importance. There is a need to understand mechanisms that may contribute to poor outcome in their psychological functioning. Thus, exploring social cognition in this population is particularly meaningful. Social cognition is an aspect of cognition that relates to the processing of social information for adaptive functioning [16]. Research on social cognition in BD is scarce and investigations have focused mostly on theory of mind (ToM), as deficits in ToM may contribute to deficiencies in social behavior [17, 18]. ToM is the ability to attribute mental states to others', including beliefs, desires, emotions, and intentions [19], and refers to a competence, that is critical. ToM allows to choose adequate responses for successful interpersonal functioning [20, 21]. ToM enables individuals to decode others' mental states based on observable information such as facial expressions and bodily gestures [22] and dysfunctions in ToM may be detrimental to social cognitive functioning [23]. There is research related to poor ability in the processing of social information in BD. In comparison to controls, psychosocial impairment is common across the three phases of BD (depression, mania and euthymia) although it has been verified that social functioning in BD patients is poorer in depression and hypomania [24].

For example, Gruber (2011) [25] and Owen et al., (2017) [26] discuss how individuals in manic mood states may be impaired in social interactions due to their increased self-esteem or delusions of grandeur, whereas those in depressive episodes may experience a loss of self-esteem and loss of interest to engage in social interactions. They suggest that symptom severity in either state of bipolar disorder can negatively affect communication in dyadic interactions. Individuals with bipolar disorder have shown impairment in role-playing scenarios of social interactions relative to healthy comparison participants [27, 28]. In attention studies of emotional stimuli, bipolar participants in manic states have a bias towards positive stimuli and positive emotional cues [25, 29], whereas participants in depressed states have a bias for negative emotional cues, e.g., [30, 31].

The literature established that in bipolar disorder some form of ToM impairment has been observed in all mood states, including euthymia [32]. Some studies have shown poor ToM performance in both manic and depressed patients and it varies depending of the state [33]. These authors examined ToM decoding abilities in the three phases of BD and found that they were

significantly less accurate in the manic phase. Other studies have shown poor ToM performance in both manic and depressed bipolar patients, but not in patients in remission [34]. Some authors have observed significant ToM dysfunctions in BD remitted patients [35, 36].

Under the specific skills or aptitudes that fall under the general term ToM, this research studied Interpersonal Accuracy (IPA) in remitted BD, as it may have an influence on functional impairment in this population. IPA refers to a perceiver's ability to decode correctly other person's states or traits that subsumes specific judgment skills related to emotion, deception, personality or other social characteristics of people [37, 38]. IPA has an adaptive value in workplaces, clinical settings and social life; it contributes to psychological adjustment and adaptive interactions with others [18]. This ability to decode and reason about others' mental states is critical to successful social and interpersonal functioning and might be related to positive behavioral outcomes [39]. As results of IPA are unclear in remitted BD, we chose this group to try to clarify this issue. When IPA deficits are present, attention should be paid to social adjustment of BD and difficulty in understanding the perspective of others may be an impediment to some psychological interventions.

The majority of research in IPA with BD has focused on facial emotions decoding, and some tests have been employed to measure IPA in this population. For example, the *Reading the Mind in the Eyes test (RMET)* [40], has been widely used in BD with different results. Most authors have found deficiencies in this population, in which stable bipolar participants scored significantly lower than the control group [41, 42, 43, 44]. Other authors have confirmed that there are not statistically significant differences between the performance of euthymic BD and control participants in this test [45, 46]. Another research, also using the RMET, compared remitted BD I and BD II, and both groups obtained similar results than control participants [47].

Social cognition has also been studied in UD, but mostly with facial affect recognition. Some studies have reported deficits in this population, when they are in symptomatic remission, comparing them to control participants [48, 49]. Wolkenstein et al. [50] compared UD to control participants, during an episode. Their results showed that they did not show deficits in facial affect recognition but they had difficulties in integrating contextual information about other people. Nevertheless, there is a lack of behavioral studies in UD in the domains of prosody, body language and IPA to determine if these findings are consistent across all components of social cognition in UD.

Most studies assessing ToM in BD have often lacked a clinical comparison, only a control group was included [23, 51, 52, 53]. To isolate disorder specific versus shared IPA impairments across mood disorders, a comparison with a group of UD was included in this research, using an ecological task, the MiniPONS test [54], a tool that has not been employed either in BD or in UD.

The use of ecologically valid IPA tasks may be an important advance in comparison to the large number of previous studies that have used only static facial stimuli in BD population. Dynamic stimuli approximate to real life situations, as interpretation of nonverbal signals is an important aspect of interpersonal accuracy. Body signals have shown to play an important role in emotion recognition [55], as these sources of nonverbal information are highly relevant in human communication [56]. When using dynamic stimuli, participants can draw upon the whole spectrum of cues as facial expression, body language and voice. Social relationships are favored by the understanding and interpretation of facial, prosodic and emotional cues from the body, and impairments in this area might contribute to the disorder's psychosocial outcome [53]. The difficulties in nonverbal area may affect negatively quality of life in BD [57]. Vaskinn et al. [58] found a global impairment in the ability of individuals with BD to perceive emotions from bodily movement, strongly associated with functional capacity, and findings of

Martino, Samamé and Strejilevich [59] showed that BD, in the recognition of disgust and fear, got worse results than controls. In general, BD shows deficits in social cognition measures with context sensitivity and involvement of real-life scenarios [60]. Tools like the PONS [61] or the MiniPONS (short form of the PONS) [54], have not been utilized either in BD or in UD. Both tests assess the ability to recognize the communication of feelings, attitudes and intentions from nonverbal expressions in face, voice, gestures and body postures and have been employed to verify social effectiveness [62].

## The present study

The current study aimed to examine IPA in patients with BD I and BD II in euthymic state, comparing them with individuals with UD and a group of control participants without psychiatric disorder. The MiniPONS (in its Spanish version) [63] was employed, to examine their ability to understand complex affective states through the perception of different nonverbal channels. We predicted that BD (I and II) would score significantly lower than control participants in the total number of responses. Another objective of this study was to find out if BD groups scored differently than the other groups, depending of the emotional valence of the stimuli. Gruber [25] has shown that BD patients exhibit heightened positive emotion responses; thus, the hypothesis was that persons with BD would give a higher number of correct answers than the healthy controls and UD, in the positive valence items.

## Materials and methods

### Participants

In this study a total of 267 persons participated, 119 had a diagnosis of BD (females = 56, males = 63). Seventy of them were diagnosed with BD I (females = 30, males = 40, mean age = 44.50, SD = 11.50) and 49 with BD II (females = 23, males = 26, mean age = 49.90, SD = 11.50), remitted. For comparison, 39 euthymic individuals diagnosed with UD were recruited (females = 33, males = 6, mean age = 62.90, SD = 9.71) and 119 healthy controls, (females = 65, males = 54, mean age = 46.10, SD = 10.80). UD patients enrolled reported a different number of males and females, there are significantly more women than men. UD sample consisted in voluntary subjects from the outpatients clinic from an hospital in Madrid (Spain). There were more voluntary women than men in this group, but this was accepted, given that there are gender differences in this disorder. The prevalence of depression is twice as high in women as in men [64, 65]. UD age was higher than that of BD groups, as the age of onset of UD disorder is about ten years significantly higher compared to BD [66, 67]. Control participants were the same age and had the same level of education as BD subjects. BD participants were selected as volunteers in two associations of persons affected by bipolar disorder in Madrid.

Demographic and clinical characteristics of the BD and UD samples are summarized in [Table 1](#).

To confirm the diagnoses, the Mini International Neuropsychiatric Interview was administered, in its Spanish adaptation [68]. Inclusion criteria were: having a diagnosis of BD (I or II) or UD and for controls, absence of any lifetime DSM-IV R Axis I diagnosis. The exclusion criteria for BD and UD were as follows: patients with a (hypo)manic or depressive episode in the previous three months, alcohol abuse in the past six months or use of psychoactive substances during the same period. All participants with psychiatric diagnosis (BD and UD) were having pharmacological treatment and had to bring a report from their psychiatrist confirming the diagnosis.

**Table 1. Demographic and clinical characteristics of BD and UD participants.**

|                | BD I (n = 70) |       | BD II (n = 49) |       | UD (n = 39) |       | Control (n = 119) |       | F        | df     | p      |
|----------------|---------------|-------|----------------|-------|-------------|-------|-------------------|-------|----------|--------|--------|
| Age (Years)    | 44.50±11.50   |       | 49.90±11.50    |       | 62.90±9.71  |       | 46.10±10.80       |       | 27.80    | 3; 273 | < .001 |
| Age at onset   | 20.23±3.8     |       | 26.50±9.3      |       | 33.47±8.43  |       | -                 |       | 46.23    | 2; 159 | < .001 |
| Gender         | n             | %     | n              | %     | n           | %     | n                 | %     | $\chi^2$ | df     | p      |
| Male           | 40            | 57.10 | 26             | 53.10 | 6           | 15.40 | 65                | 54.60 | 12.40    | 3      | .006   |
| Female         | 30            | 42.90 | 23             | 46.90 | 33          | 84.60 | 54                | 45.40 |          |        |        |
| Medication BD  | BD I          |       |                |       | BD II       |       |                   |       |          |        |        |
|                | n             | %     | n              | %     | n           | %     | n                 | %     |          |        |        |
| Lithium        | 25            | 38.46 |                |       | 12          | 25.53 |                   |       |          |        |        |
| Anticonvulsant | 24            | 36.92 |                |       | 17          | 36.17 |                   |       |          |        |        |
| Antipsychotic  | 28            | 43.07 |                |       | 7           | 14.89 |                   |       |          |        |        |
| Antidepressant | 10            | 15.38 |                |       | 12          | 25.53 |                   |       |          |        |        |

<https://doi.org/10.1371/journal.pone.0222112.t001>

All subjects taking part in this research were Spanish speakers and completed a written consent to participate in the investigation. The study was approved by the Ethics Committee of the Hospital General de la Defensa Gómez-Ulla, in Madrid, and has been carried out in accordance with the Helsinki Declaration of 1975.

### Measures

To assess euthymia, in BD and UD samples, the Beck Depression Inventory (BDI II), in its Spanish version [69], was employed, and Young Mania Rating Scale (YMRS) in its Spanish adaptation [70], in BD sample.

BD and UD patients had to be euthymic as determined by a score  $\geq 30$  on the BDI II and BDs  $\geq 7$  on the YMRS as well. The  $\geq 30$  score was used in BDI II. In the Spanish adaptation for BDI II, for non-clinical and clinical Spanish populations, the cut-off scores would be equal to or higher than 19 and 30 respectively, since those scores would show specificities over 90% and positive predictive values of 61% [71].

### Assessment of IPA

The test MiniPONS [54], in its Spanish version [63] was administered. MiniPONS consists in a set of short video clips that feature a woman with manipulated negative and positive emotional tone of facial expressions, body language, and voice. The MiniPONS is a test of accuracy of inferring the affective meanings of nonverbal cues. In this test, all the stimuli are grouped in a 2x2 design that combines affective valence (positivity-negativity) and dominance (dominance-submission). These categories are represented by three different type of video channels (full figure, neck to knee, and face) and two audio channels. It is administered through a computer application that presents the stimuli and records the responses (the total score). The response procedure consists in asking the subject to select, from 2 possible options, which one he thinks is the correct answer as to what the woman in the films is expressing. In this sample, internal consistency is around .70.

### Statistical analysis

Comparison between groups was done. The software used for the analysis was SPSS version 23 (IBM Corporation, 2015). An alpha significance level equal to 0.05 was used for the analysis. The descriptive statistics for the variables were considered in the present study, to find out if control group had higher scores than clinical groups (BD I, BD II and UD) in the number of

right answers, and a better performance in every subscale of the MiniPONS. An ANCOVA test was applied to control the effects of age on the MiniPONS scales. To find out which groups were different, a Tukey's post hoc test was done, to compare the performance of all clinical groups with the control group.

## Results

Table 2 shows the descriptive statistics for the variables considered in the present study.

Table 2 summarizes the Number of participants, the Means and the Standard deviations of all the groups.

Results show that control group has higher scores in the number of right answers and a better performance in every subscale of the MiniPONS.

To control the effect of age, an ANCOVA analysis has been performed. Results are shown in Table 3. It is observed that, despite controlling the effect of age on the MiniPONS scales, there are still differences in the performance of each scale associated with the groups (BD, UD and control). The effect size associated with the group is practically double that the effect size associated with age. This happens in in all areas, being the only exception the Audio-prosody channel. In this channel there are differences between BDI and control participants and between UD and controls, but not between BD II and control group. The rest of the differences are not significant.

Group differences and age in the prediction of MiniPONS scores are in the ANCOVA analysis in Table 3.

Table 4 is the pairwise comparison between groups (with Tukey's post-hoc test). Results show that, when the clinical groups (BD I, BD II and UD) are compared with the control group, they perform worse, and there are no differences when comparing the clinical groups among them. In the audio prosody channel, there were no differences between patients with BD II and control group.

## Discussion

The present study examined if IPA deficits in BD were evident in comparison to control group and UD. Four groups were considered in the analysis: BD I, BD II, UD and control group (Tables 2–4). After controlling the effect of age, in the post hoc tests, it is observed that there is an effect of group and age, although the effect of the group is always greater than that of age. With respect to the different channels, in the audio-prosody channel, the control group had the highest score than the other groups, there were significant differences only between BD I and control participants and between UD and controls, but the differences between BD II and control group are not significant. In face video channel, no differences exist between clinical groups, but control group performs better than all the other groups, and these results are repeated in body video channel and in the combined channel. With respect to positive, negative, dominant and submissive channels, there are no differences among clinical groups and control group. This group performed significantly better.

Results showed that, when BDs (I and II) had to evaluate different types of nonverbal cues, with the MiniPONS, their judgements were impaired, as they did not recognize well the implicit understanding of others' communication. Our hypothesis was that remitted BD would perform worse than controls and UD. Contrary to our hypothesis, results show that BD, in recognition of the meaning of gestures in face, body and voice intonation, performed significantly worse than control group, but not than UD. Researchers have proposed that individuals with depression show reduced positive emotion reactivity [72], unlike BD, that when

Table 2. Descriptive statistics.

| MiniPONS                | Group   | N   | Mean  | Median | SD   | Min   | Max   | Skew  | Kurt  |
|-------------------------|---------|-----|-------|--------|------|-------|-------|-------|-------|
| Number of right answers | BD I    | 70  | 45.10 | 45.00  | 4.85 | 28.00 | 56.00 | -.632 | 1.62  |
|                         | BD II   | 49  | 45.70 | 46.00  | 4.75 | 33.00 | 55.00 | -.356 | -.134 |
|                         | UD      | 39  | 42.70 | 43.00  | 4.97 | 32.00 | 53.00 | -.106 | -.585 |
|                         | Control | 119 | 50.20 | 50.00  | 3.70 | 39.00 | 58.00 | -.338 | -.040 |
| Audio prosody channel   | BD I    | 70  | 10.80 | 11.00  | 2.07 | 3.00  | 14.00 | -1.15 | 2.77  |
|                         | BD II   | 49  | 11.30 | 12.00  | 1.97 | 6.00  | 15.00 | .400  | .097  |
|                         | UD      | 39  | 10.40 | 11.00  | 1.97 | 7.00  | 14.00 | -.051 | -.96  |
|                         | Control | 119 | 12.20 | 12.00  | 1.98 | 6.00  | 16.00 | -.44  | .029  |
| Combined channel        | BD I    | 70  | 12.00 | 12.00  | 1.63 | 8.00  | 16.00 | .012  | .350  |
|                         | BD II   | 49  | 11.80 | 12.00  | 1.90 | 7.00  | 15.00 | -.488 | .135  |
|                         | UD      | 39  | 11.00 | 11.00  | 2.21 | 6.00  | 15.00 | -.138 | -.177 |
|                         | Control | 119 | 13.20 | 14.00  | 1.63 | 8.00  | 16.00 | -.493 | -.157 |
| Face video channel      | BD I    | 70  | 11.30 | 11.00  | 1.68 | 8.00  | 15.00 | .050  | -.82  |
|                         | BD II   | 49  | 11.40 | 12.00  | 1.63 | 8.00  | 15.00 | -.159 | .035  |
|                         | UD      | 39  | 11.00 | 11.00  | 1.57 | 8.00  | 14.00 | -.171 | -.91  |
|                         | Control | 119 | 12.50 | 12.00  | 1.48 | 9.00  | 15.00 | -.128 | -.46  |
| Body video channel      | BD I    | 70  | 11.10 | 11.00  | 1.81 | 6.00  | 15.00 | -.525 | .204  |
|                         | BD II   | 49  | 11.20 | 11.00  | 1.74 | 6.00  | 14.00 | -.585 | .199  |
|                         | UD      | 39  | 10.40 | 10.00  | 2.28 | 5.00  | 15.00 | -.089 | -.312 |
|                         | Control | 119 | 12.30 | 12.00  | 1.59 | 9.00  | 16.00 | -.123 | -.247 |
| Positive Valence        | BD I    | 70  | 22.60 | 23.00  | 3.20 | 14.00 | 29.00 | -.444 | .059  |
|                         | BD II   | 49  | 22.90 | 23.00  | 2.88 | 17.00 | 28.00 | -.075 | -.740 |
|                         | UD      | 39  | 21.30 | 22.00  | 3.28 | 13.00 | 28.00 | -.364 | -.472 |
|                         | Control | 119 | 25.20 | 25.00  | 2.52 | 19.00 | 30.00 | -.235 | .221  |
| Negative Valence        | BD I    | 70  | 22.60 | 23.00  | 2.94 | 13.00 | 29.00 | -.464 | .675  |
|                         | BD II   | 49  | 22.80 | 23.00  | 3.11 | 16.00 | 28.00 | -.374 | -.323 |
|                         | UD      | 39  | 21.40 | 22.00  | 3.18 | 10.00 | 26.00 | -1.17 | 3.00  |
|                         | Control | 119 | 25.10 | 25.00  | 2.45 | 19.00 | 30.00 | -.309 | -.508 |
| Dominant                | BD I    | 70  | 22.70 | 23.00  | 3.11 | 12.00 | 29.00 | -1.15 | 2.38  |
|                         | BD II   | 49  | 22.60 | 23.00  | 3.23 | 13.00 | 29.00 | -.491 | .763  |
|                         | UD      | 39  | 21.50 | 21.00  | 2.95 | 16.00 | 29.00 | .123  | .139  |
|                         | Control | 119 | 24.90 | 25.00  | 2.51 | 16.00 | 31.00 | -.446 | .866  |
| Submissive              | BD I    | 70  | 22.40 | 22.50  | 2.70 | 15.00 | 28.00 | -.453 | .060  |
|                         | BD II   | 49  | 23.10 | 23.00  | 2.71 | 18.00 | 28.00 | .151  | -.977 |
|                         | UD      | 39  | 21.20 | 22.00  | 3.24 | 13.00 | 29.00 | -.062 | .426  |
|                         | Control | 119 | 25.40 | 25.00  | 2.21 | 17.00 | 30.00 | -.421 | .705  |

<https://doi.org/10.1371/journal.pone.0222112.t002>

compared with healthy population, an alteration of positive affect exists in this group of patients [73].

Affective intensity can be an indicator of impairment beyond the predictive value of inter-episode symptoms in this population [74]. Our hypothesis was that BD groups would give a higher number of correct responses in positive valence items. However, this result did not come about. In this study, BD individuals presented significant lower overall results than control group in the evaluated IPA task, including recognition of positive valence stimuli, which can be understood as an empathy deficit. This emotional deficiency might be one of the mechanisms that can facilitate the maintenance of maladaptive behaviors in this disorder. Social

Table 3. ANCOVA summarizes the differences of every group in the scores in different channels.

| MiniPONS                | Variable | F     | df     | p     | $\eta^2$ |
|-------------------------|----------|-------|--------|-------|----------|
| Number of right answers | Group    | 31.50 | 3, 272 | <.001 | .258     |
|                         | Age      | 25.50 | 1, 272 | <.001 | .086     |
| Audio prosody channel   | Group    | 10.33 | 3, 272 | <.001 | .102     |
|                         | Age      | 6.19  | 1, 272 | .013  | .022     |
| Combined channel        | Group    | 13.31 | 3, 272 | <.001 | .128     |
|                         | Age      | 5.92  | 1, 272 | .016  | .021     |
| Face video channel      | Group    | 13.00 | 3, 272 | <.001 | .125     |
|                         | Age      | 20.50 | 1, 272 | <.001 | .070     |
| Body video channel      | Group    | 11.12 | 3, 272 | <.001 | .109     |
|                         | Age      | 8.67  | 1, 272 | .004  | .031     |
| Positive Valence        | Group    | 17.90 | 3, 272 | <.001 | .165     |
|                         | Age      | 19.00 | 1, 272 | <.001 | .065     |
| Negative Valence        | Group    | 18.30 | 3, 272 | <.001 | .168     |
|                         | Age      | 10.90 | 1, 272 | .001  | .038     |
| Dominant                | Group    | 13.80 | 3, 272 | <.001 | .132     |
|                         | Age      | 12.70 | 1, 272 | <.001 | .045     |
| Submissive              | Group    | 28.30 | 3, 272 | <.001 | .238     |
|                         | Age      | 20.20 | 1, 272 | <.001 | .069     |

<https://doi.org/10.1371/journal.pone.0222112.t003>

cognitive deficits and functional impairment are associated with poor psychological adjustment in BD [57, 75]. Body and facial expressions and body postures display relevant information about emotional behaviors and intentions [76], and research exists that shows that deficits in facial emotional identification have a negative impact on participation to social and daily activities and hobbies in BD [77]. For these group of patients, the ability to accurately infer the emotions of others, to identify and anticipate the reactions and intentions of other individuals is highly important in social situations, as it provides information on the meaning of their responses to forthcoming events. Treatment modalities of BD comprise psychotropic medication and psychosocial interventions [78]. As Gitlin and Miklowitz [2] suggest, in BD, recovery comprises symptomatic and functional improvement and psychosocial interventions can speed recoveries from episodes [79]. A desirable goal to accomplish should provide treatment to achieve syndromal as well as functional recovery in BD. BD treatment, then, presents challenges in preventing recurrences and assuring complete recovery between episodes in terms of both symptom remission and restoration of social and occupational functioning. Prevention and treatment programs are needed in the development of future interventions in BD, involving comprehension of the correct complex affective states. According to the model of emotional competence [80], people with higher scores in the test MiniPONS may have more social sensibility skills, as they can easier perceive internal states of others. Recognition of dynamic nonverbal signals as face and body movements are relevant in human communication [56] and a high level of proficiency in the recognition of nonverbal signals relates to the ability to correctly infer the complex affective states that individuals experience and communicate in specific social situations.

Acquirement of competences in the inference of others' internal states should help BDs to a better understanding of social communication and thus, increase the satisfaction in interpersonal relationships. To accomplish the objective of functional rehabilitation of BD patients, achievement of such abilities might have a greater impact in their social functionality and, consequently, lead to a higher adaptation to everyday life.



Table 4. Tukey post-hoc comparisons are shown in this table.

| MiniPONS                | Group          | Mean difference | SE   | df  | t      | p     |
|-------------------------|----------------|-----------------|------|-----|--------|-------|
| Number of right answers | BD I- BD II    | -1.143          | .794 | 272 | -1.440 | .476  |
|                         | BD I-Control   | -5.279          | .635 | 272 | -8.316 | <.001 |
|                         | BD I- UD       | .262            | .943 | 272 | .278   | .992  |
|                         | BD II- Control | -4.136          | .720 | 272 | -5.749 | <.001 |
|                         | BD II- UD      | 1.405           | .952 | 272 | 1.475  | .454  |
|                         | Control- UD    | 5.541           | .869 | 272 | 6.374  | <.001 |
| Audio prosody channel   | BD I- BD II    | -.675           | .374 | 272 | -1.808 | .272  |
|                         | BD I-Control   | -1.513          | .299 | 272 | -5.064 | <.001 |
|                         | BD I- UD       | -.104           | .444 | 272 | -.233  | .996  |
|                         | BD II- Control | -.838           | .339 | 272 | -2.474 | .066  |
|                         | BD II- UD      | .572            | .448 | 272 | 1.276  | .579  |
|                         | Control- UD    | 1.409           | .409 | 272 | 3.445  | .004  |
| Combined channel        | BD I- BD II    | .120            | .331 | 272 | .362   | .984  |
|                         | BD I-Control   | -1.171          | .265 | 272 | -4.422 | <.001 |
|                         | BD I- UD       | .608            | .394 | 272 | 1.544  | .412  |
|                         | BD II- Control | -1.291          | .300 | 272 | -4.300 | <.001 |
|                         | BD II- UD      | .488            | .397 | 272 | 1.229  | .609  |
|                         | Control- UD    | 1.779           | .363 | 272 | 4.905  | <.001 |
| Face video channel      | BD I- BD II    | -.3557          | .287 | 272 | -1.241 | .601  |
|                         | BD I-Control   | 1.333           | .229 | 272 | -5.814 | <.001 |
|                         | BD I- UD       | -.443           | .341 | 272 | -1.299 | .564  |
|                         | BD II- Control | -.977           | .260 | 272 | -3.760 | .001  |
|                         | BD II- UD      | -.087           | .344 | 272 | -.253  | .994  |
|                         | Control- UD    | .89             | .314 | 272 | 2.835  | .025  |
| Body video channel      | BD I- BD II    | -.231           | .331 | 272 | -.699  | .897  |
|                         | BD I-Control   | -1.262          | .265 | 272 | -4.767 | <.001 |
|                         | BD I- UD       | .200            | .394 | 272 | .509   | .957  |
|                         | BD II- Control | -1.031          | .300 | 272 | -3.434 | .004  |
|                         | BD II- UD      | .432            | .397 | 272 | 1.087  | .698  |
|                         | Control- UD    | 1.463           | .363 | 272 | 4.034  | <.001 |
| Positive valence        | BD I- BD II    | -.633           | .526 | 272 | -1.203 | .625  |
|                         | BD I-Control   | -2.672          | .421 | 272 | -6.348 | <.001 |
|                         | BD I- UD       | .041            | .626 | 272 | .066   | 1     |
|                         | BD II- Control | -2.039          | .477 | 272 | -4.273 | <.001 |
|                         | BD II- UD      | .674            | .632 | 272 | 1.068  | .710  |
|                         | Control- UD    | 2.713           | .577 | 272 | 4.706  | <.001 |
| Negative valence        | BD I- BD II    | -.509           | .521 | 272 | -.979  | .762  |
|                         | BD I-Control   | -2.607          | .416 | 272 | -6.261 | <.001 |
|                         | BD I- UD       | .221            | .619 | 272 | .357   | .984  |
|                         | BD II- Control | -2.097          | .472 | 272 | -4.444 | <.001 |
|                         | BD II- UD      | .731            | .625 | 272 | 1.170  | .646  |
|                         | Control- UD    | 2.828           | .570 | 272 | 4.959  | <.001 |

(Continued)

Table 4. (Continued)

| MiniPONS   | Group          | Mean difference | SE   | df  | t      | p     |
|------------|----------------|-----------------|------|-----|--------|-------|
| Dominant   | BD I- BD II    | -.126           | .529 | 272 | -.238  | .995  |
|            | BD I-Control   | -2.219          | .423 | 272 | -5.247 | <.001 |
|            | BD I- UD       | .214            | .629 | 272 | .340   | .986  |
|            | BD II- Control | -2.093          | .479 | 272 | -4.366 | <.001 |
|            | BD II- UD      | .339            | .634 | 272 | .535   | .950  |
|            | Control- UD    | 2.432           | .579 | 272 | 4.200  | <.001 |
| Submissive | BD I- BD II    | -1.017          | .472 | 272 | -2.153 | .139  |
|            | BD I-Control   | -3.060          | .378 | 272 | -8.099 | <.001 |
|            | BD I- UD       | .049            | .562 | 272 | .086   | 1     |
|            | BD II- Control | -2.043          | .428 | 272 | -4.771 | <.001 |
|            | BD II- UD      | 1.066           | .567 | 272 | 1.880  | .239  |
|            | Control- UD    | 3.109           | .517 | 272 | 6.008  | <.001 |

<https://doi.org/10.1371/journal.pone.0222112.t004>

There are some limitations in this research and some issues of this study remain unresolved. The “MiniPONS” is merely one of the methods that can be used to determine deficits in IPA. In this research, the MiniPONS was chosen because it has ecological validity, as it presents dynamic scenes that are closer to real life situations than static pictures. Although there are numerous advantages in using this test, the fact that videos in this include only features of a woman make results to be generalizable only for woman features, and more research is needed in the case of men features. Among the main limitations and directions for future research, there is the fact that this research has been done with remitted BDs, and it would be interesting to incorporate patients in other phases of the disease, to examine the effects of mood. Comparison between BD-mania, BD-depression and BD-euthymia is important and can be a future prospect. Another limitation is that, in this research, all BD participants were medicated, but we were unable to investigate the influence of medication effects on results. As to whether these drugs worsen social cognitions, such as IPA, further research is required. The medication profile of this sample was markedly heterogeneous. Dose effects, or the type of medication might have potential influences of medication on IPA performance. A future prospective is to control this variable in further studies. Besides, comparing them with other groups that present IPA deficits such as schizophrenia and autism, could be a line of future research. Another future prospect is to conduct a longitudinal study with chronic BDs and analyze if there are changes in their interpersonal accuracy.

## Conclusions

This research studied ToM in BD, with an IPA measure based on social situations of different types of activity, the test MiniPONS. Results showed impairments in the performance of BD and UD, in the recognition of the meaning of gestures in face, body and voice intonation. Acquisition of competences in the inference of others’ internal states should help BDs to a better understanding of social communication. Thus, treatment modalities involving a better comprehension of others’ internal states, is a desirable goal to achieve in this population.

## Supporting information

**S1 Table. Raw data of patients participating in this study.** Clinical characteristics of patients and results in the different scales of MiniPONS. (CSV)

## Acknowledgments

The authors would like to thank the participants whose contribution made this study possible. We also especially thank Elena Porras, who helped to recruit research participants.

## Author Contributions

**Conceptualization:** Enrique G. Fernández-Abascal.

**Formal analysis:** Mercedes Ovejero.

**Investigation:** Usue Espinós.

**Methodology:** Mercedes Ovejero.

**Project administration:** Enrique G. Fernández-Abascal.

**Resources:** Usue Espinós.

**Supervision:** Enrique G. Fernández-Abascal, Mercedes Ovejero.

**Writing – original draft:** Usue Espinós.

## References

1. American Psychiatric Association. Diagnostic and statistical manual of mental disorders. 5th ed. Arlington, VA: American Psychiatric Publishing, 2013.
2. Gitlin MJ, Miklowitz DJ. The difficult lives of individuals with bipolar disorder: A review of functional outcomes and their implications for treatment. *J Affect Disord.*2017; 209:147–54. <https://dx.doi.org/10.1016/j.jad.2016.11.021> PMID: 27914248
3. Sanchez-Moreno J, Martinez-Aran A, Tabarés-Seisdedos R, Torrent C, Vieta E, Ayuso-Mateos JL. Functioning and disability in bipolar disorder: an extensive review. *Psychother Psychosom.*2009; 78(5): 285–297. <http://dx.doi.org/10.1159/000228249> PMID: 19602917
4. MacQueen GM, Young LT, Joffe RT. A review of psychosocial outcome in patients with bipolar disorder. *Acta Psychiatr Scand.*2001; 103(3):163–170. <http://dx.doi.org/10.1034/j.1600-0447.2001.00059.x> PMID: 11240572
5. Tohen M, Hennen J, Zarate CM Jr, Baldessarini RJ, Strakowski SM, Stoll AL et al. (2000). Two-year syndromal and functional recovery in 219 cases of first episode major affective disorder with psychotic features. *Am J Psychiatr.* 2000; 157(2):220–28. <http://dx.doi.org/10.1176/appi.ajp.157.2.220> PMID: 10671390
6. Martinez-Arán A, Vieta E, Torrent C, Sanchez-Moreno J, Goikolea JM, Salamero L et al. Functional outcome in bipolar disorder: the role of clinical and cognitive factors. *Bipolar Disord.*2007; 9(1–2):103–113. <http://dx.doi.org/10.1111/j.1399-5618.2007.00327.x> PMID: 17391354
7. Michalak EE, Jones S, Lobban F, Algorta GP, Barnes SJ, Berk M. Harnessing the potential of community-based participatory research approaches in bipolar disorder. *Intern J Bipolar Disord.*2016; 4(1):4. <https://dx.doi.org/10.1186/s40345-016-0045-5>
8. Depp CA, Mausbach BT, Harvey PD, Bowie CR, Wolyniec PD, Thornquist MH et al. Social competence and observer-rated social functioning in bipolar disorder. *Bipolar Disord.*2010; 12(8): 843–50. <http://dx.doi.org/10.1111/j.1399-5618.2010.00880.x> PMID: 21176031
9. M RL, Young AH. Theory of Mind in Bipolar Disorder, with comparison to the impairments observed in schizophrenia. *Front Psychiatr.*2016; 6:188. <https://dx.doi.org/10.3389/fpsy.2015.00188>
10. Tondo L, Visioli C, Preti A, Baldessarini RJ. Bipolar disorders following initial depression: modeling predictive clinical factors. *J. Affect. Disord.*2014; 167: 44–4. <https://dx.doi.org/10.1016/j.jad.2014.05.043> PMID: 25082113
11. Hirschfeld RM. Differential diagnosis of bipolar disorder and major depressive disorder. *J. Affect. Disord.*2014; 169 S1: S12–S16. [https://dx.doi.org/10.1016/S0165-0327\(14\)70004-7](https://dx.doi.org/10.1016/S0165-0327(14)70004-7)
12. Hirschfeld RM, Lewis L, Vornik LA. Perceptions and impact of bipolar disorder: How far have we really come? Results of the National Depressive and Manic-Depressive Association 2000 survey of individuals with bipolar disorder. *J Clin Psychiatry.*2003; 64: 161–174. <https://dx.doi.org/10.4088/JCP.v64n0209> PMID: 12633125

13. Grande I, Berk M, Birmaher B, Vieta E. Bipolar disorder. *Lancet*.2016; 387(10027): 1561–1572. [https://dx.doi.org/10.1016/S0140-6736\(15\)00241-X](https://dx.doi.org/10.1016/S0140-6736(15)00241-X) PMID: 26388529
14. Kupfer DJ, Frank E, Phillips ML, 2012. Major depressive disorder: new clinical, neurobiological, and treatment perspectives. *Lancet*.2012; 379 (9820): 1045–1055. [https://dx.doi.org/10.1016/S0140-6736\(11\)60602-8](https://dx.doi.org/10.1016/S0140-6736(11)60602-8) PMID: 22189047
15. Mitchell PB, Goodwin GM, Johnson GF, Hirschfeld RM. Diagnostic guidelines for bipolar depression: a probabilistic approach. *Bipolar Disord*.2008; 10: 144–152. <https://dx.doi.org/10.1111/j.1399-5618.2007.00559.x> PMID: 18199233
16. Ochsner KN., Lieberman MD. The emergence of social cognitive neuroscience. *Am Psychol*.2001; 56 (9):717–734. PMID: 11558357
17. Schlegel K, Boone RT, Hall JA. Individual Differences in Interpersonal Accuracy: A Multi-Level Meta-Analysis to Assess Whether Judging Other People is One Skill or Many. *J Nonverb Behav*.2017; 41:103–137. <http://dx.doi.org/10.1007/s10919-017-0249-0>
18. Efenbein HA, Foo MD, White J, Tan HH, Aik VC. Reading your counterpart: The benefit of emotion recognition accuracy for effectiveness in negotiation. *J Nonverb Behav* 2007; 31(4):205–223. <https://doi.org/10.1007/s10919-007-0033-7>
19. Premack D, Woodruff G. Does the chimpanzee have a theory of mind? *Behav Brain Sci*.1978; 4:51–526. <http://dx.doi.org/10.1017/S0140525X00076512>
20. Allison T, Puce A, McCarthy G. Social perception from visual cues: Role of the STS region. *Trends Cogn. Sci*. 2000; 4:267–78. [http://dx.doi.org/10.1016/S1364-6613\(00\)01501-1](http://dx.doi.org/10.1016/S1364-6613(00)01501-1) PMID: 10859571
21. Green MF, Horan WP. Social Cognition in Schizophrenia. *Current Directions in Psychol Sci* 2010; 19 (4):243–48. <http://dx.doi.org/10.1177/0963721410377600>
22. Samamé C, Martino DJ, Strejilevich S. Social cognition in euthymic bipolar disorder: systematic review and meta-analytic approach. *Acta Psychiatr Scand* 2012; 125(4):266–280. <http://dx.doi.org/10.1111/j.1600-0447.2011.01808.x> PMID: 22211280
23. Bora E, Vahip S, Gonul AS, Akdeniz F, Alkan M, Ogut M et al. Evidence for theory of mind deficits in euthymic patients with bipolar disorder. *Acta Psychiatr Scand*.2005; 112(2):110–116. <https://dx.doi.org/10.1111/j.1600-0447.2005.00570.x> PMID: 15992392
24. Malhi GS, Ivanovski B, Hadzi-Pavlovic D, Mitchell PB, Vieta E, Sachdev P. Neuropsychological deficits and functional impairment in bipolar depression, hypomania and euthymia. *Bipolar Disord*.2007; 9(1–2): 114–125. <http://dx.doi.org/10.1111/j.1399-5618.2007.00324.x> PMID: 17391355
25. Gruber J. Can Feeling Too Good Be Bad? Positive Emotion Persistence (PEP) in Bipolar Disorder. *Curr Dir Psychol Sci*.2011; 20(4): 217–221. <https://doi.org/10.1177/0963721411414632>
26. Owen R, Gooding P, Dempsey R, Jones S. The reciprocal relationship between bipolar disorder and social interaction: A qualitative investigation. *Clin Psychol Psychoth*.2017; 24(4): 911–918. <https://dx.doi.org/10.1002/cpp.2055>
27. Mausbach BT, Harvey PD, Pulver A, Depp CA, Wolyniec PS, Thornquist MH et al. Relationship of the Brief UCSD Performance-based Skills Assessment (UPSA-B) to multiple indicators of functioning in people with schizophrenia and bipolar disorder. *Bipolar Disord*.2010; 12(1)45–55. <https://dx.doi.org/10.1111/j.1399-5618.2009.00787.x> PMID: 20148866
28. Garcia-Portilla MP, Gomar JJ, Bobes-Bascaran MT, Menendez-Miranda I, Saiz PA, Muñiz J et al. Validation of a European Spanish-version of the University of California performance Skills Assessment (Sp-UPSA) in patients with schizophrenia and bipolar disorder. *Schizophr Res*.2013; 150(2–3):421–426. <http://dx.doi.org/10.1016/j.schres.2013.07.049> PMID: 24055246
29. Jongen EM, Smulders FT, Ranson SM, Arts BM, Krabbendam L. Attentional bias and general orienting processes in bipolar disorder. *J Behav Therapy and Exp Psychiatry*.2007; 38(2):168–183. <https://doi.org/10.1016/j.jbtep.2006.10.007>
30. Peckham AD, McHugh RK, Otto MW. A meta-analysis of the magnitude of biased attention in depression. *Depression and Anxiety*. 2010; 27(12):1135–1142. <https://dx.doi.org/10.1002/da.20755> PMID: 21049527
31. Leppänen JM. Emotional information processing in mood disorders: a review of behavioral and neuroimaging findings. *Curr Opin Psychiatr*.2006; 19(1):34–39. <http://dx.doi.org/10.1097/01.yco.0000191500.46411.00>
32. Mitchell RLC, Young AH. Theory of Mind in Bipolar Disorder, with Comparison to the Impairments Observed in Schizophrenia. *Front. Psychiatry*.2016; 6:188. <http://dx.doi.org/10.3389/fpsy.2015.00188>. PMID: 26834648
33. Hawken ER, Harkness KL, Lazowski LK, Summers D, Kohja N, Gregory JG, Milev R. The manic phase of Bipolar disorder significantly impairs theory of mind decoding. *Psychiatry Res*.2016; 239: 275–280. <http://doi.org/10.1016/j.psychres.2016.03.043> PMID: 27039012

34. Kerr N, Dunbar RIM, Bentall RP. Theory of mind deficits in bipolar affective disorder. *J. Affect Disord.*2003; 73(3), 253–259. [https://doi.org/10.1016/S0165-0327\(02\)00008-3](https://doi.org/10.1016/S0165-0327(02)00008-3) PMID: 12547294
35. Bora E, Veznedaroglu B, Vahip S. Theory of mind and executive functions in schizophrenia and bipolar disorder: A cross-diagnostic latent class analysis for identification of neuropsychological subtypes. *Schizophrenia Res.*2016; 173(2–3): 500–505. <https://doi.org/10.1016/j.schres.2016.06.007>
36. Shamay-Tsoory SG, Shur S, Barcai-Goodman L, Medlovich S, Harari H, Levkovitz Y. Dissociation of cognitive from affective components of theory of mind in schizophrenia. *Psychiatry Res.*2007; 149(1–3):11–23. <http://dx.doi.org/10.1016/j.psychres.2005.10.018> PMID: 17107716
37. Schlegel K, Boone RT, Hall JA. Individual Differences in Interpersonal Accuracy: A Multi-Level Meta-Analysis to Assess Whether Judging Other People is One Skill or Many. *J Nonverb Behav.*2017; 41:103–137. <https://dx.doi.org/10.1007/s10919-017-0249-0>
38. Hall JA, Horgan TG, Murphy NA. Nonverbal Communication. *Ann Rev Psychol* 2019; 70(1):271–294. <https://doi.org/10.1146/annurev-psych-010418-103145>
39. Schmid Mast MS, Hall JA. The Impact of Interpersonal Accuracy on Behavioral Outcomes. *Curr Direct Psychol Sci.*2018; 27(5):309–314. <https://doi.org/10.1177/0963721418758437>
40. Baron-Cohen S, Wheelwright S, Hill J, Raste Y, Plumb I. The “Reading the Mind in the Eyes” Test Revised Version: A Study with Normal Adults, and Adults with Asperger Syndrome or High-functioning Autism. *J Child Psych Psychiatry* 2001; 42(2):241–251. <https://dx.doi.org/10.1111/1469-7610.00715>
41. Cusi A, MacQueen GM, McKinnon MC. Patients with bipolar disorder show impaired performance in complex test of social cognition. *Psychiatry Res.*2012; 200(2–3):258–264. <http://dx.doi.org/10.1016/j.psychres.2012.06.021> PMID: 22854176
42. Espinós U, Fernández-Abascal EG, Ovejero M. What your eyes tell me: Theory of mind in bipolar disorder. *Psychiatry Res* 2018; 262:536–41. <https://dx.doi.org/10.1016/j.psychres.2017.09.039> PMID: 28969860
43. Ibanez A, Urquina H, Petroni A, Baez S., Lopez V, do Nascimento M et al. Neural Processing of Emotional Facial and Semantic Expressions in Euthymic Bipolar Disorder (BD) and its Association with Theory of Mind (ToM). *PLoS One.*2012; 7(10):e46877 <http://dx.doi.org/10.1371/journal.pone.0046877> PMID: 23056505
44. Thaler NS, Allen D, Sutton NP, Vertinski M, Ringdahl EN. Differential impairment of social cognition factors in bipolar disorder with and without psychotic features and schizophrenia. *J Psychiatr Res.*2013; 47:2004–2010. <http://dx.doi.org/10.1016/j.jpsychires.2013.09.010> PMID: 24112946
45. Barrera A, Vázquez G, Tannenhaus L, Lolich M, Herbst L. Theory of mind and functionality in bipolar patients with symptomatic remission. *Revista de Psiquiatría y Salud Mental.* 2013; 6: 67–74. <http://dx.doi.org/10.1016/j.rpsmen.2012.07.003> PMID: 23084796
46. Purcell AL, Phillips M, Gruber J. In your eyes: Does theory of mind predict impaired functioning in bipolar disorder? *J Affect Disord.*2013; 151(3):1113–1119. <http://dx.doi.org/10.1016/j.jad.2013.06.051> PMID: 23896318
47. Martino DJ, Strejilevich SA, Fassi G, Marengo E, Igoa A. Theory of mind and facial emotion recognition in euthymic bipolar I and bipolar II disorders. *Psychiatry Res.*2011; 189(3):379–384. <https://dx.doi.org/10.1016/j.psychres.2011.04.033> PMID: 21620484
48. Nejati V. Negative interpretation of social cue in depression: Evidence from reading mind from eyes test. *Neurology, Psychiatry and Brain Research.*2018; 27: 12–16. <https://doi.org/10.1016/j.npbr.2017.11.001>
49. Yamada K, Inoue Y, Kanba S. Theory of mind ability predicts prognosis of outpatients with major depressive disorder. *Psychiatry Res.*2015; 230(2), 604–608. <https://doi.org/10.1016/j.psychres.2015.10.011> PMID: 26477953
50. Wolkenstein L, Schönenberg M, Schirm E, Hautzinger M. I can see what you feel, but I can't deal with it: Impaired theory of mind in depression. *J Affect Disord.*2011; 132 (1–2): 104–111. <https://doi.org/10.1016/j.jad.2011.02.010> PMID: 21420177
51. Bora E, Veznedaroglu B, Vahip S. Theory of mind and executive functions in schizophrenia and bipolar disorder: A cross-diagnostic latent class analysis for identification of neuropsychological subtypes. *Schizophr Res.*2016; 173(2–3): 500–505. <https://doi.org/10.1016/j.schres.2016.06.007>
52. Montag C, Ehrlich A, Neuhaus K, Dziobek I, Heekeren HR, Heinz A, Gallinat J. Theory of mind impairments in euthymic bipolar patients. *J Affect Disord.*2010; 123(1): 264–269. <http://dx.doi.org/10.1016/j.jad.2009.08.017>
53. VanRheenen TE, Rossell SL. Picture sequencing task performance indicates theory of mind deficit in bipolar disorder. *J Affect Disord.*2013; 151: 1132–1134. <http://dx.doi.org/10.1016/j.jad.2013.07.009> PMID: 23916306

54. Bänziger T, Scherer KR, Hall JA, Rosenthal R. Introducing the MiniPONS: A Short Multichannel Version of the Profile of Nonverbal Sensitivity (PONS). *J Nonverb Behav.*2011; 35(3):189–204. <http://dx.doi.org/10.1007/s10919-011-0108-3>
55. Aviezer H, Trope Y, Todorov A. Body cues, not facial expressions, discriminate between intense positive and negative emotions. *Science.*2012; 338(6111): 1225–1229. <http://dx.doi.org/10.1126/science.1224313> PMID: 23197536
56. Tracy JL, Randles D, Steckler CL. The Nonverbal Communication of Emotions. *Curr Op Behav Sci.*2015; 3: 25–30. <http://dx.doi.org/10.1016/j.cobeha.2015.01.001>
57. Fulford D, Peckham AD, Johnson K, Johnson SL. Emotion perception and quality of life in bipolar I disorder. *J Affect Disord.*2014; 152:491–497. <http://dx.doi.org/10.1016/j.jad.2013.08.034> PMID: 24070906
58. Vaskinn A, Lagerberg TV, Bjella TD, Simonsen C, Andreassen OA, Ueland T, Sundet K. Impairment in emotion perception from body movements in individuals with bipolar I and bipolar II disorder is associated with functional capacity. *International J Bipolar Disord.*2017; 5(1):1–9. <https://doi.org/10.1186/s40345-017-0083-7>
59. Martino DJ, Samamé C, Streljevič SA. Stability of facial emotion recognition performance in bipolar disorder. *Psychiatry Res.*2016; 243:182–184. <http://dx.doi.org/10.1016/j.psychres.2016.06.026> PMID: 27416537
60. Baez S, Herrera E, Villarin L, Theil D, Gonzalez-Gadea ML, Gomez P et al. Contextual social cognition impairments in schizophrenia and bipolar disorder. *Plos One.*2013; 8(3):e57664. <https://doi.org/10.1371/journal.pone.0057664> PMID: 23520477
61. Rosenthal R, Hall JA, DiMatteo MR, Rogers PL, Archer D. Sensitivity to nonverbal communication: The PONS Test. Baltimore: The Johns Hopkins University Press 1979.
62. Schlegel K, Grandjean D, Scherer KR. Constructs of social and emotional effectiveness: Different labels, same content? *J Res Person.*2013; 47:249–253. <https://dx.doi.org/10.1016/j.jrp.2013.02.005>
63. Martínez-Sánchez F, Fernández-Abascal E G, Martínez-Modía JC. Adaptación española de la versión reducida multicanal del Perfil de Sensibilidad No Verbal (MiniPONS). *Anales de Psicología.*2013; 29(2):604–613. <http://dx.doi.org/10.6018/analesps.29.2.161851>
64. Kuehner C. Why is depression more common among women than among men? *The Lancet Psychiatry.*2017; 4(2): 146–158. [https://doi.org/10.1016/S2215-0366\(16\)30263-2](https://doi.org/10.1016/S2215-0366(16)30263-2) PMID: 27856392
65. Salk RH, Hyde JS, Abramson LY. Gender differences in depression in representative national samples: meta-analyses of diagnoses and symptoms. *Psychol. Bull.*2017; 143: 783–822. <https://dx.doi.org/10.1037/bul0000102> PMID: 28447828
66. Odegaard KJ, Syrstad VEG, Morken G, Akiskal HS, Fasmer OB. A study of age at onset and affective temperaments in a Norwegian sample of patients with mood disorders. *J Affect Disord.*2009; 118(1–3): 229–233. <http://dx.doi.org/10.1016/j.jad.2009.01.030> PMID: 19243836
67. Tondo L, Lepri B, Cruz N, Baldessarini RJ. Age at onset in 3014 Sardinian bipolar and major depressive disorder patients. *Acta Psychiatr Scand.*2010; 121: 446–452. <https://doi.org/10.1111/j.1600-0447.2009.01523.x>
68. Ferrando L, Bobes J, Gibert, J, Soto M, Soto O. MINI: Entrevista Neuropsiquiátrica Internacional. Versión en Español 5.0.0. DSM-IV 2000. Traducida por L. Franco-Alfonso, L. Franco. Retrieved from <http://entomologia.rediris.es/pub/bscw/cgi/d602335/MINI/Entrevista%20Neuropsiquiátrica%20Internacional.pdf>
69. Sanz J, Perdigón AL, Vázquez C. Adaptación española del Inventario para la Depresión de Beck-II (BDI-II): 2. Propiedades psicométricas en población general. *Clínica y Salud.*2003; 14(3): 249–280. Retrieved in: <http://www.redalyc.org/articulo.oa?id=180617972001>. Matched ISSN: 1130–5274
70. Colom F, Vieta E, Martínez-Arán A, García-García M, Reinares M, Torrent C et al. Versión española de una escala de la evaluación de la manía: Validez y fiabilidad de la escala de Young. *Medicina Clínica* 2002; 119: 366–371. [http://dx.doi.org/10.1016/S0025-7753\(02\)73419-2](http://dx.doi.org/10.1016/S0025-7753(02)73419-2)
71. Sanz J. 50 años de los inventarios de depresión de Beck: Consejos para la utilización de la adaptación Española del BDI II en la práctica clínica. *Papeles del Psicólogo.* 2013; 34(3): 161–68. <http://www.papelesdelpsicologo.es> ISSN 0214-7823
72. Bylsma LM, Morris BH, Rottenberg J. A meta-analysis of emotional reactivity in major depressive disorder. *Clinical Psychology Rev.*2008; 28(4): 676–691. <https://doi.org/10.1016/j.cpr.2007.10.001>
73. Gruber J, Siegel EH, Purcell AL, Earls HA, Cooper G Barrett LF. Unseen positive and negative affective information influences social perception in bipolar I disorder and healthy adults. *J Affect Disord.*2016; 192: 191–198. <http://dx.doi.org/10.1016/j.jad.2015.12.037> PMID: 26745436
74. Gershon A, Eidelman P. Inter-episode affective intensity and instability: Predictors of depression and functional impairment in bipolar disorder. *J Behav Therapy Exp Psychiatry.*2015; 46: 14–18. <https://dx.doi.org/10.1016/j.jbtep.2014.07.005>

75. Hoertnagl CM, Yalcin-Seidentopf M, Baumgartner S, Biedermann F, Deisenhammer EA, Hausmann A. .... Hofer A. Affective prosody perception in symptomatically remitted patients with schizophrenia and bipolar disorder. *Schizophrenia Research*.2014; 158: 100–104. <http://dx.doi.org/10.1016/j.schres.2014.07.019> PMID: 25096540
76. De Gelder B. Towards the neurobiology of emotional body language. *Nat Rev Neurosci*. 2006; 7 (3):242–249. <https://dx.doi.org/10.1038/nm1872> PMID: 16495945
77. Aydemir O, Akkaya C, Uykur B, Erol A. Effect of facial emotion recognition on subjective psychosocial functioning in bipolar patients. *Acta Psychiatr Scand*. 2013; 127:412–413. <https://doi.org/10.1111/acps.12069> PMID: 23331124
78. Geddes JR, Miklowitz DJ. Treatment of bipolar disorder. *The Lancet*.2013; 381(9878): 1672–1682. [https://doi.org/10.1016/S0140-6736\(13\)60857-0](https://doi.org/10.1016/S0140-6736(13)60857-0)
79. Miklowitz DJ, Johnson SL. Social and Familial Factors in the Course of Bipolar Disorder: Basic Processes and Relevant Interventions. *Clin Psychol* 2009; 16(2):281.296. <http://dx.doi.org/10.1111/j.1468-2850.2009.01166.x>
80. Scherer KR. The dynamic architecture of emotion: Evidence for the component process model. *Cogn Emot* 2009; 7: 1307–1351. <http://dx.doi.org/10.1080/02699930902928969>
